# Supplementary material for: New algorithms to represent complex pseudoknotted RNA structures in dot-bracket notation
Source: PubMed Central journal article supplement — Bioinformatics. 2017 Dec 11;34(8):1304–12. doi: 10.1093/bioinformatics/btx783 (PMC5905660; doi:10.1093/bioinformatics/btx783), 2017-12-11
Supplement: btx783_supplementary-material.pdf [file btx783_supplementary-material.pdf]

# New algorithms to represent complex pseudoknotted RNA structures in dot-bracket notation

– Supplementary material –

Maciej Antczak<sup>1</sup>, Mariusz Popena<sup>2</sup>, Tomasz Zok<sup>1,3</sup>, Michal Zurkowski<sup>1</sup>, Ryszard W. Adamiak<sup>1,2</sup>, and Marta Szachniuk<sup>1,2,\*</sup>

<sup>1</sup>*Institute of Bioorganic Chemistry, Polish Academy of Sciences, Noskowskiego 12/14, 61-704 Poznan, Poland*

<sup>2</sup>*Institute of Computing Science, Poznan University of Technology, Piotrowo 2, 60-965 Poznan, Poland*

<sup>3</sup>*Poznan Supercomputing and Networking Center, Jana Pawla II 10, 61-139 Poznan, Poland*

*\*To whom correspondence should be addressed*

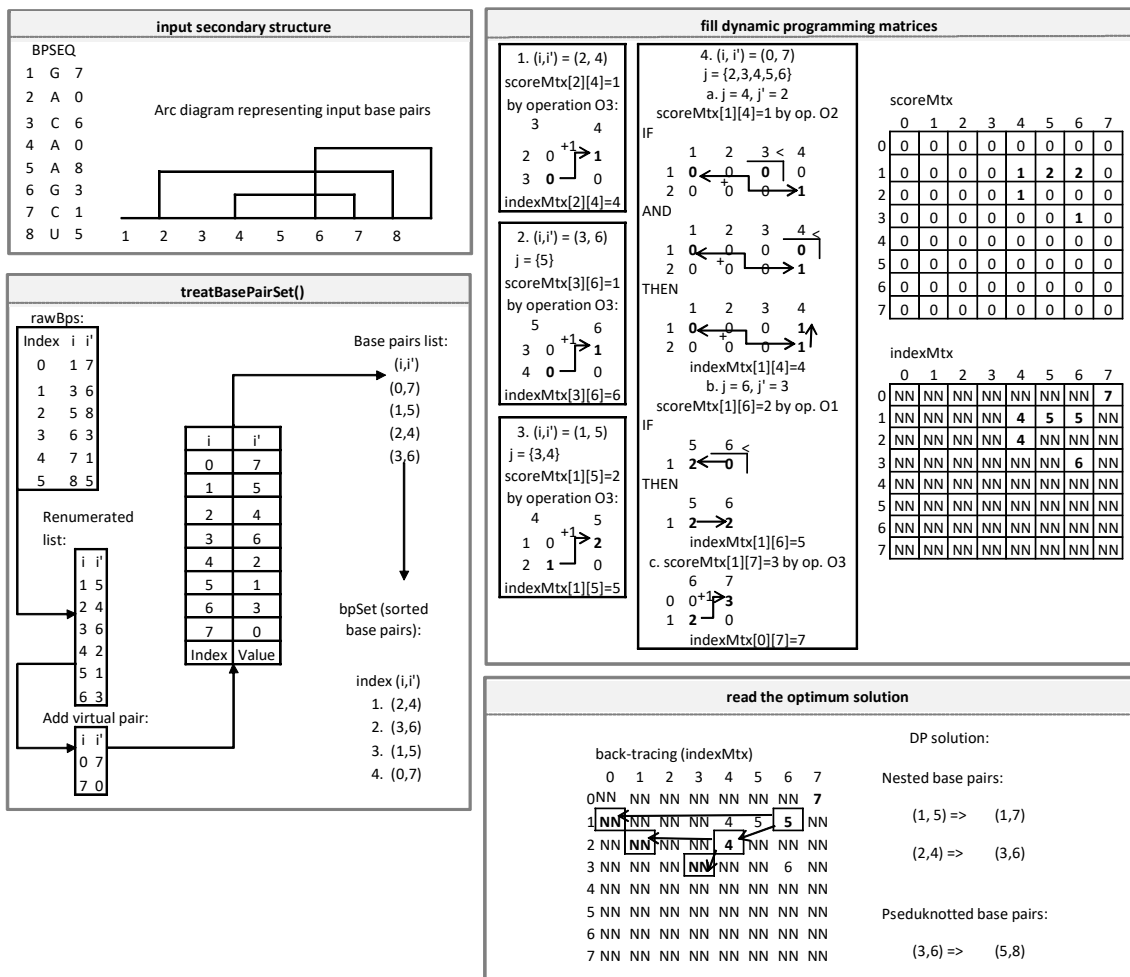

### read the optimum solution

back-tracing (indexMtx)

|   |    |    |    |    |    |    |    |
|---|----|----|----|----|----|----|----|
| 0 | 1  | 2  | 3  | 4  | 5  | 6  | 7  |
| 0 | NN | NN | NN | NN | NN | NN | 7  |
| 1 | NN | NN | NN | 4  | 5  | 5  | NN |
| 2 | NN | NN | NN | 4  | NN | NN | NN |
| 3 | NN | NN | NN | NN | NN | 6  | NN |
| 4 | NN |
| 5 | NN |
| 6 | NN |
| 7 | NN |

DP solution:

Nested base pairs:

(1, 5) => (1,7)  
(2,4) => (3,6)

Pseuduknotted base pairs:

(3,6) => (5,8)

Figure S1: Example execution of DP algorithm.

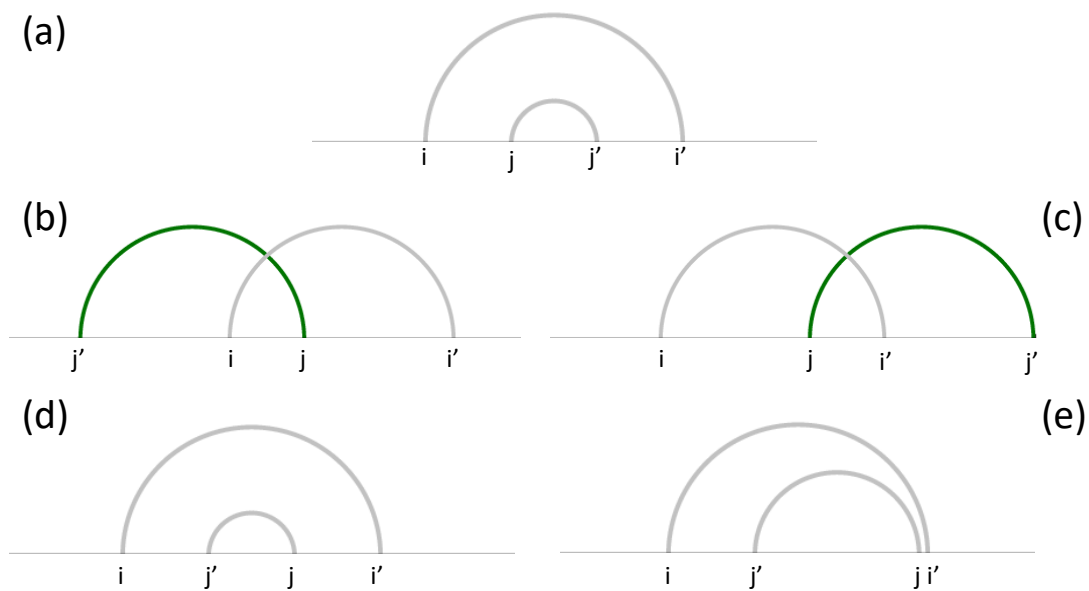

Figure S2: Relationships between two base pairs differentiated by DP algorithm.

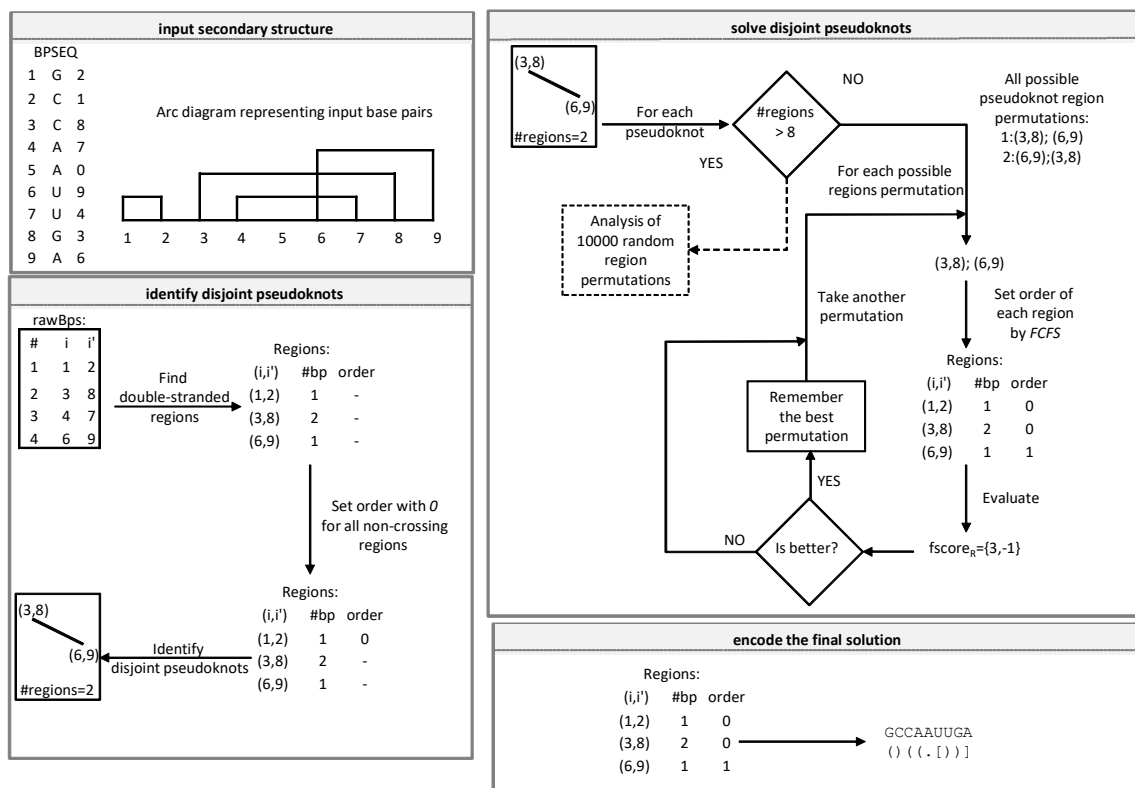

Figure S3: Example execution of HYB algorithm.

Table S1: All-against-all algorithm comparison for  $DS1'$  dataset upon  $f_{scoreI}$ .

|                | FCFS | EG | EC | DP | HYB | # Duels won | # Battles won |
|----------------|------|----|----|----|-----|-------------|---------------|
| FCFS           | –    | 0  | 1  | 0  | 0   | 1           | 0             |
| EG             | 69   | –  | 17 | 0  | 1   | 87          | 0             |
| EC             | 70   | 5  | –  | 0  | 0   | 75          | 0             |
| DP             | 74   | 5  | 17 | –  | 1   | 97          | 0             |
| HYB            | 73   | 5  | 16 | 0  | –   | 94          | 0             |
| # Duels lost   | 286  | 15 | 51 | 0  | 2   | –           | –             |
| # Battles lost | 65   | 0  | 1  | 0  | 0   | –           | –             |

Table S2: All-against-all algorithm comparison for  $DS2'$  dataset upon  $f_{scoreI}$ .

|                | FCFS | EG | EC  | DP | HYB | # Duels won | # Battles won |
|----------------|------|----|-----|----|-----|-------------|---------------|
| FCFS           | –    | 0  | 4   | 0  | 0   | 4           | 0             |
| EG             | 159  | –  | 85  | 0  | 4   | 248         | 0             |
| EC             | 99   | 5  | –   | 0  | 1   | 105         | 0             |
| DP             | 162  | 5  | 85  | –  | 4   | 256         | 0             |
| HYB            | 159  | 5  | 82  | 0  | –   | 246         | 0             |
| # Duels lost   | 579  | 15 | 256 | 0  | 9   | –           | –             |
| # Battles lost | 96   | 0  | 4   | 0  | 0   | –           | –             |

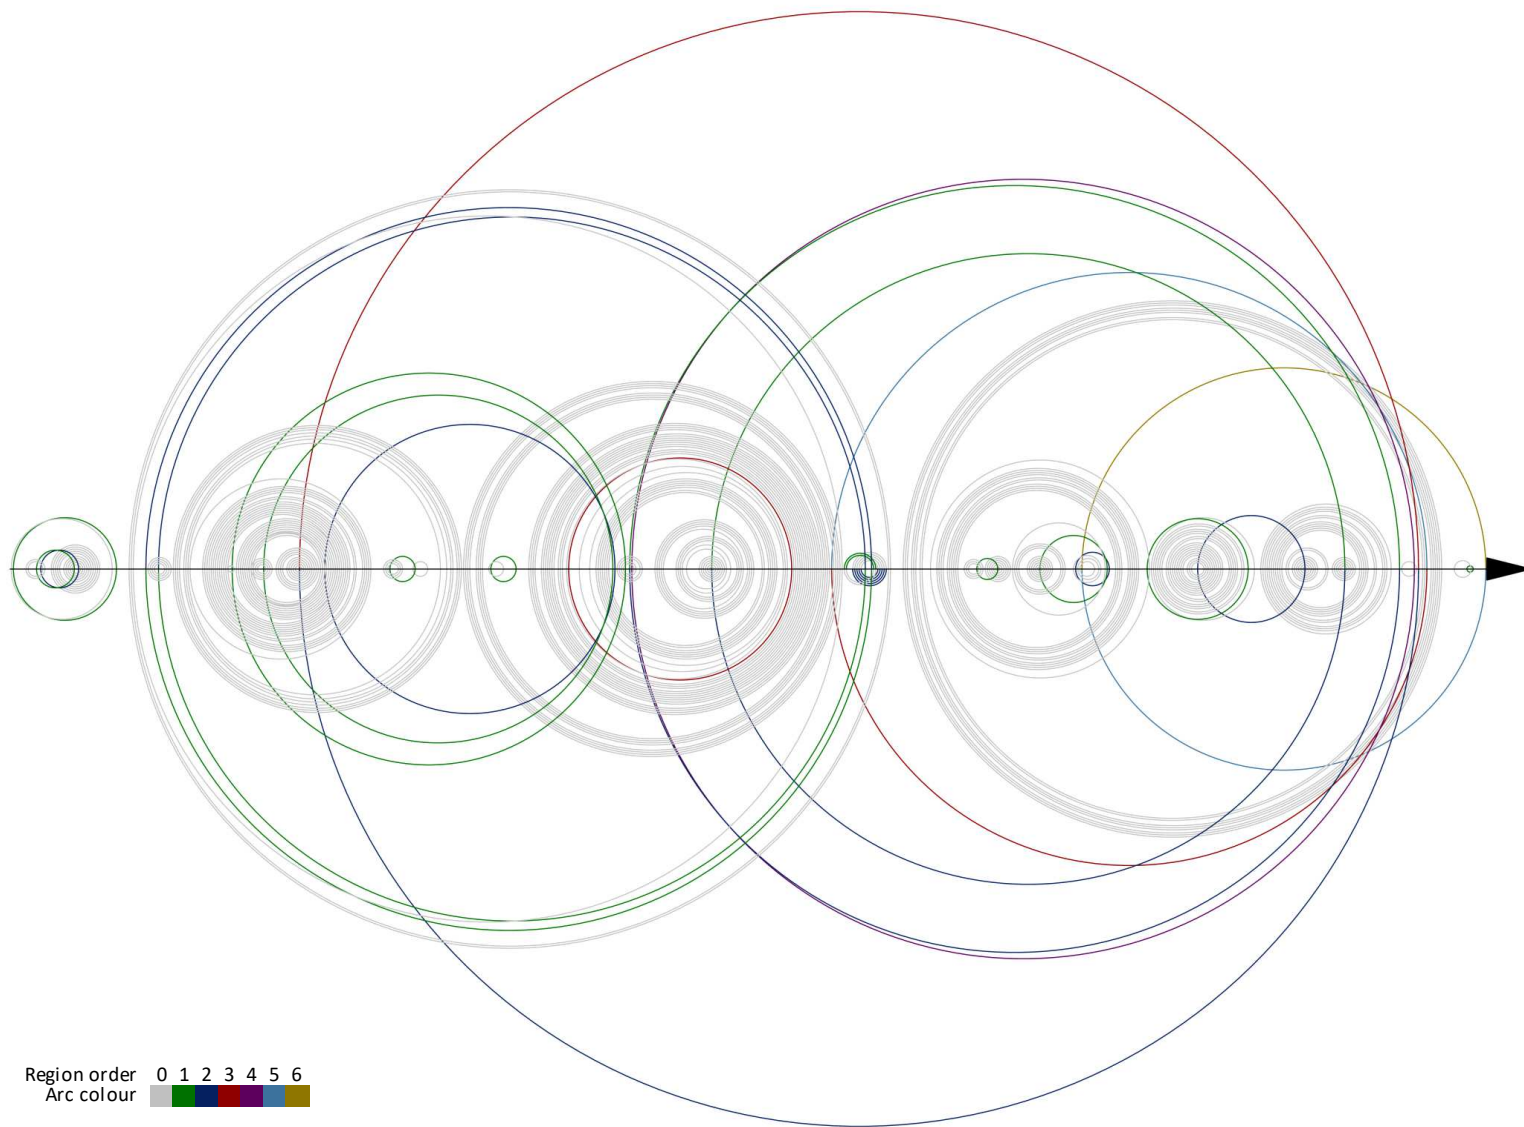

Figure S4: Arc diagrams of pseudoknot-involved regions in RNA from ribosomal subunit from human mitochondria (3J7Y, chain A) corresponding to EG/EC/DP (top) and FCFS (bottom) results.

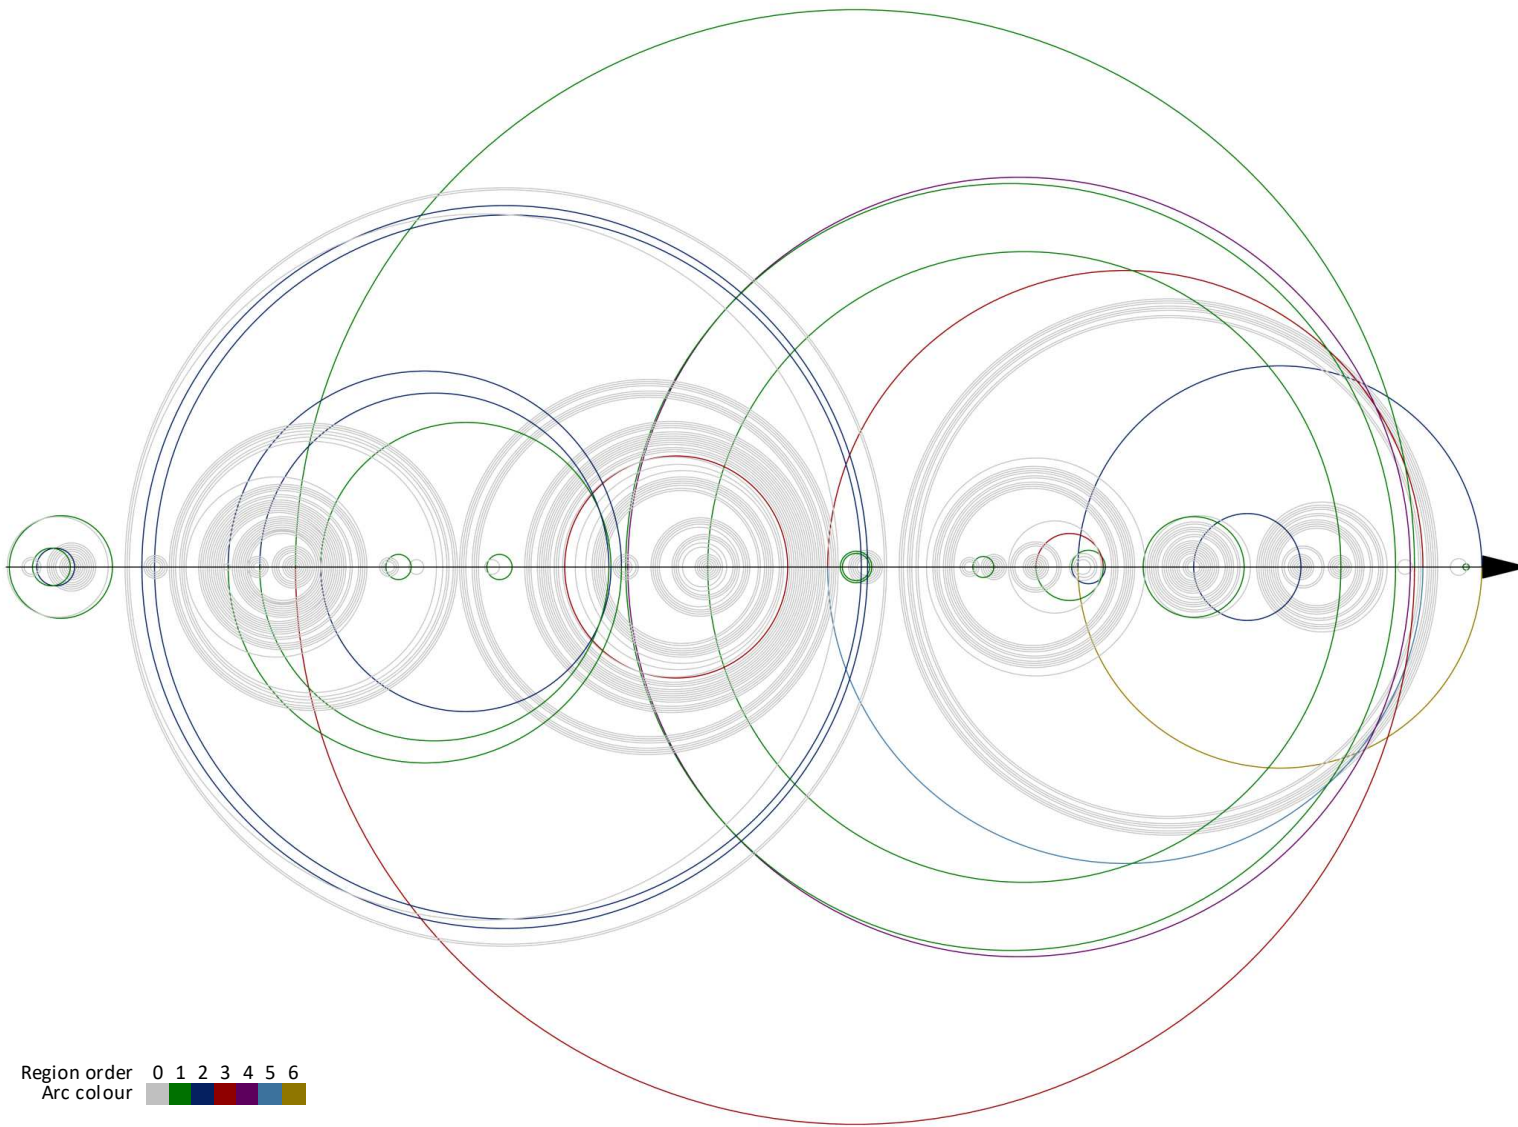

Figure S5: Arc diagrams of pseudoknot-involved regions in RNA from ribosomal subunit from human mitochondria (3J7Y, chain A) corresponding to HYB (top) and EG/EC/DP (bottom) results.
